# Supplementary material for: The Relationship between Coronary Artery Wall Shear Strain and Plaque Morphology: A Systematic Review and Meta-Analysis
Source: MDPI journal article supplement (doi:10.3390/diagnostics10020091), 2020-02-08

## Supplement material

### Supplement 1. Qualitative assessment of study reporting.

| Domain                | Questions                                                                                                                  | Judgments          |
|-----------------------|----------------------------------------------------------------------------------------------------------------------------|--------------------|
| <b>Risk of bias</b>   |                                                                                                                            |                    |
| 1) Patient selection  | <i>Was a consecutive or random sample of patients enrolled?</i>                                                            | Yes, No, Unclear   |
|                       | <i>Was a case-control design avoided?</i>                                                                                  | Yes, No, Unclear   |
|                       | <i>Did the study avoid inappropriate exclusions?</i>                                                                       | Yes, No, Unclear   |
|                       | <i>Could the selection of patients have introduced bias?</i>                                                               | Low, High, Unclear |
| <b>Applicability</b>  | <i>Is there concern that the included patients do not match the review questions?</i>                                      | Low, High, Unclear |
| 1) Patient selection  |                                                                                                                            |                    |
| <b>Risk of bias</b>   | <i>Were the index test results interpreted without knowledge of the results of the reference standard?</i>                 | Yes, No, Unclear   |
| 2) Index test         | <i>If a threshold was used, was it pre-specified?</i>                                                                      | Yes, No, Unclear   |
|                       | <i>Could the conduct or interpretation of the index test have introduced bias?</i>                                         | Low, High, Unclear |
| <b>Applicability</b>  | <i>Is there concern that the index test, its conduct, or interpretation differ from the review question?</i>               | Low, High, Unclear |
| 2) Index test         |                                                                                                                            |                    |
| <b>Risk of bias</b>   | <i>Is the reference standard likely to correctly classify the target condition?</i>                                        | Yes, No, Unclear   |
| 3) Reference standard | <i>Were the reference standard results interpreted?</i>                                                                    | Yes, No, Unclear   |
|                       | <i>If Yes, was it without knowledge of the results of the index test?</i>                                                  | Yes, No, Unclear   |
|                       | <i>Could the reference standard, its conduct, or its interpretation have introduced bias?</i>                              | Low, High, Unclear |
| <b>Applicability</b>  | <i>Is there concern that the target condition as defined by the reference standard does not match the review question?</i> | Low, High, Unclear |
| 3) Reference standard |                                                                                                                            |                    |
| <b>Risk of bias</b>   | <i>Was there an appropriate interval between index test(s) and reference standard?</i>                                     | Yes, No, Unclear   |
| 4) Flow and timing    | <i>Did all patients receive a reference standard?</i>                                                                      | Yes, No, Unclear   |
|                       | <i>Did patients receive the same reference standard?</i>                                                                   | Yes, No, Unclear   |
|                       | <i>Were all patients included in the analysis?</i>                                                                         | Yes, No, Unclear   |
|                       | <i>Could the patient flow have introduced bias?</i>                                                                        | Low, High, Unclear |

**Patients:** Patients with CAD; different types of WSS.

**Index test:** Relationship between types of WSS and plaque morphology.

**Comparator test (if applicable):** Baseline features of vulnerability of coronary artery in different types of WSS.

**Target condition:** Role of types of WSS in coronary plaque; reference standard: morphology of coronary plaque.

**Supplementary 2.** Comparison of baseline lumen area, plaque area, plaque burden, and necrotic core in group of intermediate WSS vs. high WSS.

**a) Baseline lumen area**

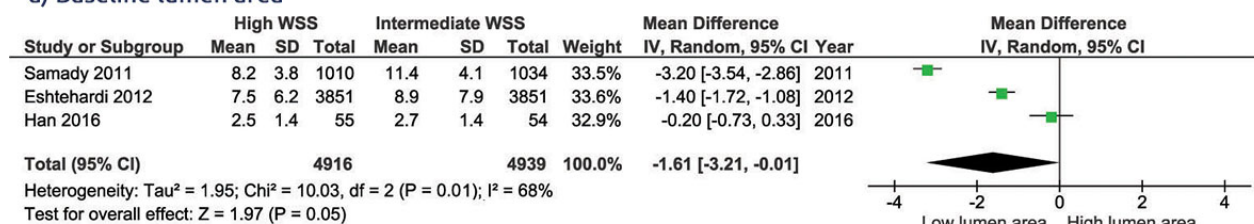

**b) Baseline plaque area**

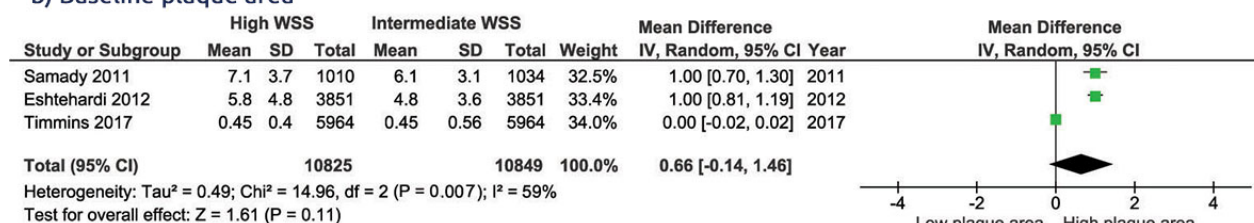

**c) Baseline plaque burden**

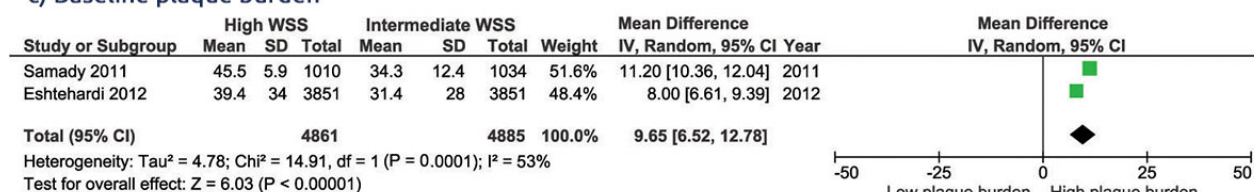

**d) Baseline necrotic core**

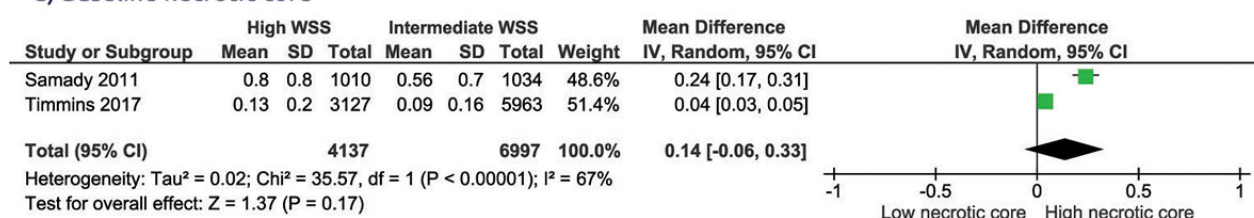

**Supplement 3.** Comparison of baseline dense calcium, fibrous, and fibro-fatty area in group of intermediate WSS vs. high WSS.

### a) Baseline dense calcium

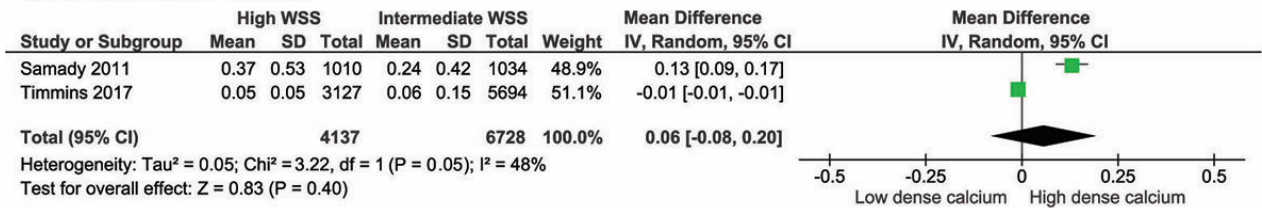

### b) Baseline fibrous area

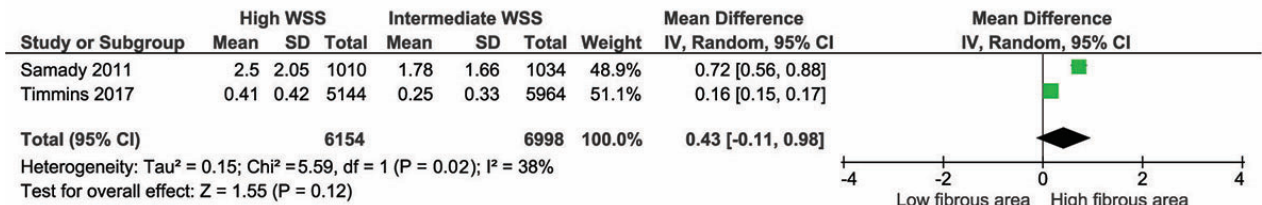

### c) Baseline fibrofatty area

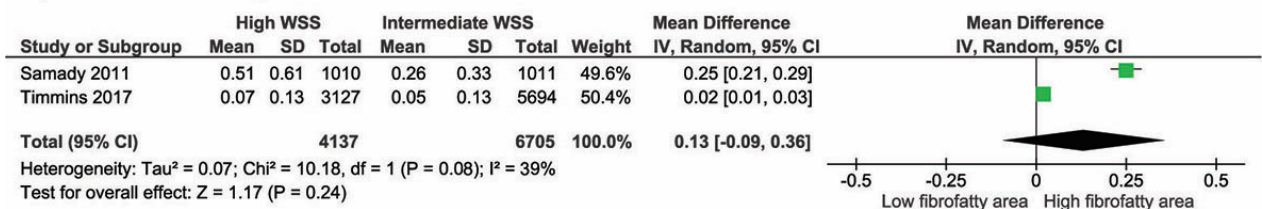

**Supplementary 4.** Comparison of baseline lumen area, plaque area, plaque burden, and necrotic core in group of low WSS vs. intermediate WSS.

#### a) Baseline lumen area

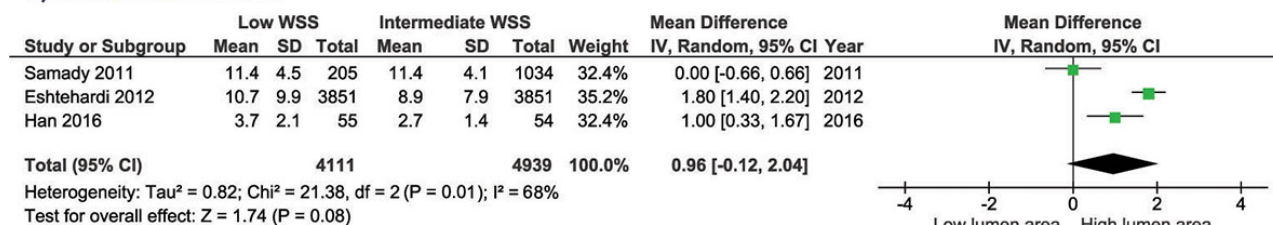

#### b) Baseline plaque area

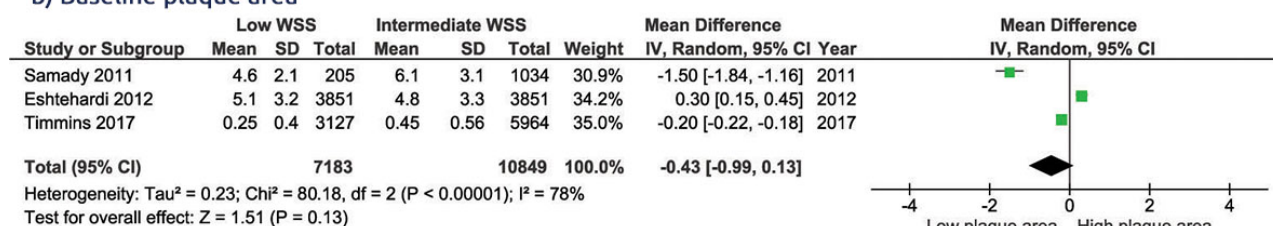

#### c) Baseline plaque burden

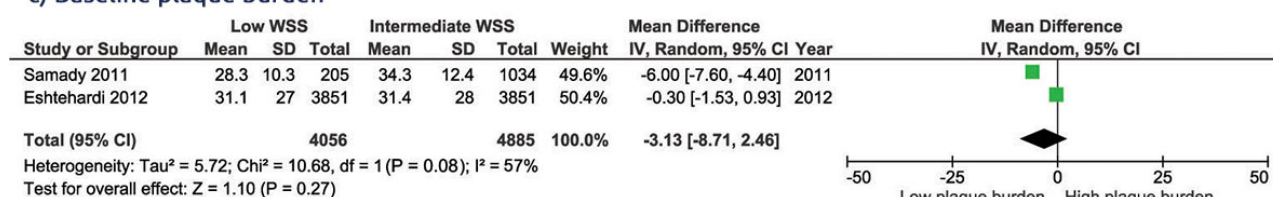

#### d) Baseline necrotic core

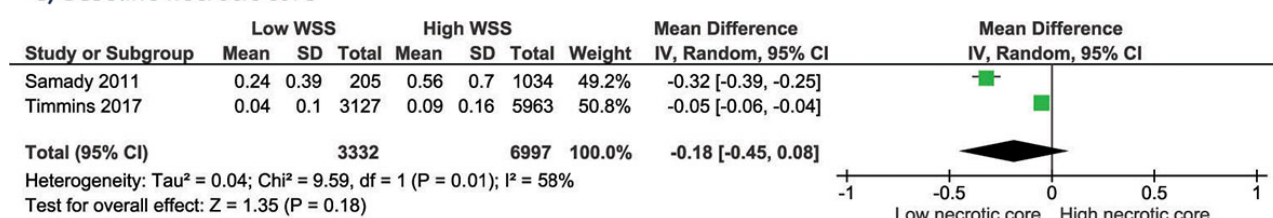

**Supplementary 5.** Comparison of baseline dense calcium, fibrous, and fibro fatty area in group of low WSS vs. intermediate WSS.

**a) Baseline dense calcium**

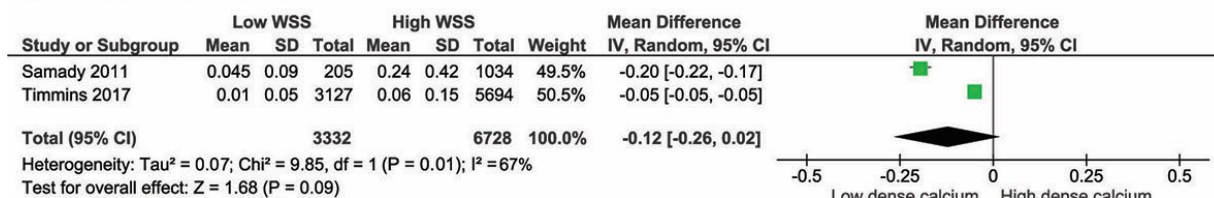

**b) Baseline fibrous area**

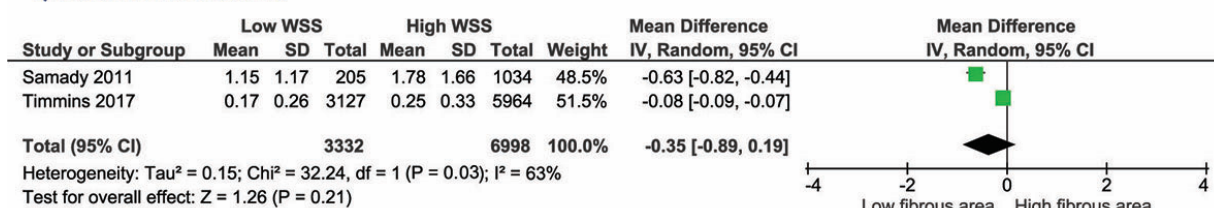

**c) Baseline fibrofatty area**

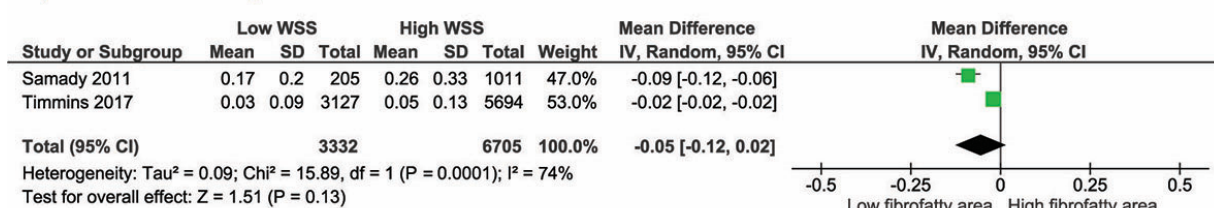

**Supplementary 6.** Summary of QUADAS-2 assessment of selected studies.

| Author<br>(year) | Risk of bias          |               |                       |                    | Applicability concerns |               |                       |
|------------------|-----------------------|---------------|-----------------------|--------------------|------------------------|---------------|-----------------------|
|                  | Patients<br>selection | Index<br>test | Reference<br>standard | Flow and<br>timing | Patients<br>selection  | Index<br>test | Reference<br>standard |
| Samady 2011      | Low                   | Low           | Low                   | Low                | Low                    | Low           | Low                   |
| Eshtehardi 2012  | Unclear               | Low           | Unclear               | Low                | Unclear                | Unclear       | Unclear               |
| Timmins 2015     | Low                   | Unclear       | Low                   | Low                | Unclear                | Unclear       | Low                   |
| Timmins 2017     | Low                   | Low           | Low                   | Low                | Low                    | Low           | Low                   |

**Supplementary 7.** Summary of quality assessment analysis (Quality Assessment of Diagnostic Accuracy Studies-QUADAS 2).

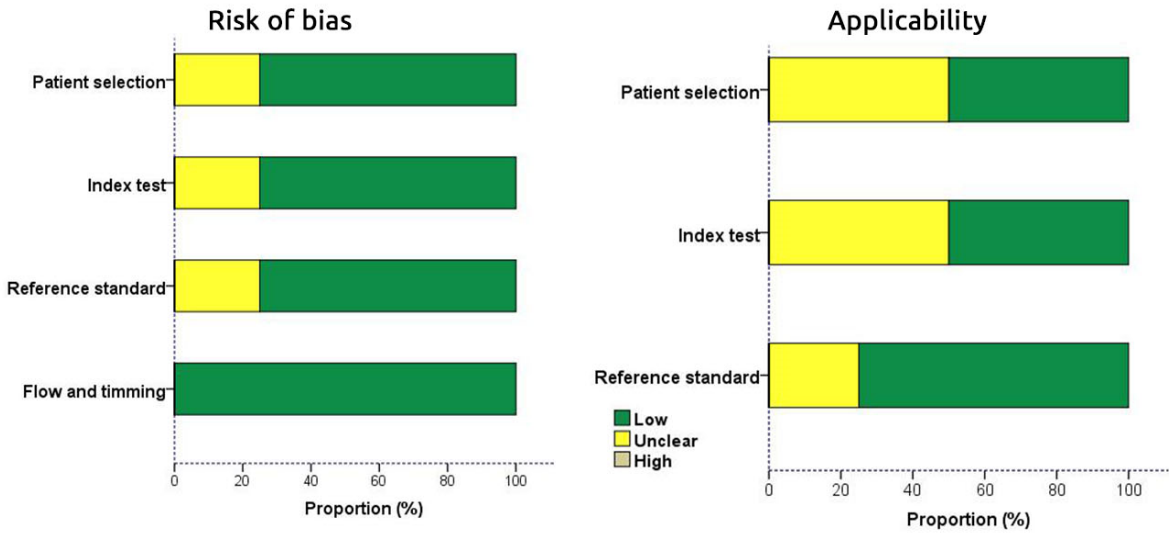

Supplement: s1 [file s1]
